# Supplementary material for: Impact of Simian Immunodeficiency Virus Infection on Chimpanzee Population Dynamics
Source: PubMed Central journal article supplement (PMC2944804; doi:10.1371/journal.ppat.1001116), 2010-09-23
Supplement: ppat.1001116.s002.pdf [file ppat.1001116.s002.pdf]

| Individual <sup>1</sup> | Sex <sup>2</sup> | Community <sup>3</sup> | Sample Code | Collection Date <sup>4</sup> | SIVcpz fecal WB <sup>5</sup> | SIVcpz fecal vRNA | Genbank Accession numbers <sup>6</sup> |     |     | Microsatellite Loci |                              |         |         |         |         |         |         |         |         |
|-------------------------|------------------|------------------------|-------------|------------------------------|------------------------------|-------------------|----------------------------------------|-----|-----|---------------------|------------------------------|---------|---------|---------|---------|---------|---------|---------|---------|
|                         |                  |                        |             |                              |                              |                   | Full Length                            | pol | env | SIVcpz strain       | mtDNA haplotype <sup>7</sup> | D18s536 | D4s243  | D10s676 | D9s922  | D2s1326 | D2s1333 | D4s1627 | D9s905  |
| Ch-107 (cont)           |                  | KL                     | 949         | 17-Nov-05                    | pos                          | neg               |                                        |     |     | 2                   | 161/173                      | 196/231 | 154/178 | 286/294 | 260/268 | 310/322 | 229/241 | 283/295 |         |
| Ch-108 <sup>8</sup>     | F                | KL                     | 868         | 6-Jun-05                     | neg                          |                   |                                        |     |     | 3                   | 141/177                      | 204/231 | 182/190 | 290/298 |         |         |         |         |         |
|                         |                  |                        | 881         | 25-Jul-05                    | neg                          |                   |                                        |     |     | 3                   | 141/177                      | 204/231 | 182/190 | 290/298 |         |         |         |         |         |
|                         |                  |                        | 1000        | 16-Mar-06                    | neg                          |                   |                                        |     |     | 3                   | 141/177                      | 204/231 | 182/190 | 290/298 | 256/260 | 318/330 | 241/249 | 271/287 |         |
|                         |                  |                        | 1090        | 26-Apr-06                    | neg                          |                   |                                        |     |     |                     | 3                            | 141/177 | 204/231 | 182/190 | 290/298 |         |         |         |         |
|                         |                  |                        | 1601        | 21-Jul-09                    | neg                          |                   |                                        |     |     |                     | 3                            | 141/177 | 204/231 | 182/190 | 290/298 | 256/260 | 318/330 | 241/249 | 271/287 |
| Ch-109                  | F                | KL                     | 893         | 18-Aug-05                    | neg                          |                   |                                        |     |     | 13                  | 141/161                      | 200/200 | 182/190 | 286/302 | 256/256 | 302/318 | 237/241 | 279/295 |         |
|                         |                  |                        | 1348        | 12-Mar-08                    | neg                          |                   |                                        |     |     | 13                  | 141/161                      | 200/200 | 182/190 | 286/302 | 256/256 | 302/318 | 237/241 | 279/295 |         |
|                         |                  |                        | 1462        | 14-Oct-08                    | neg                          |                   |                                        |     |     |                     | 13                           | 141/161 | 200/200 | 182/190 | 286/302 | 256/256 | 302/318 | 237/241 | 279/295 |
|                         |                  |                        | 1705        | 9-Jul-09                     | neg                          |                   |                                        |     |     |                     | 13                           | 141/161 | 200/200 | 182/190 | 286/302 | 256/256 | 302/318 | 237/241 | 279/295 |
| Ch-110                  | M                | KL                     | 939         | 13-Feb-06                    | neg                          |                   |                                        |     |     | 11                  | 141/153                      | 196/200 | 182/190 | 268/294 |         |         |         |         |         |
|                         |                  |                        | 1141        | 12-Aug-06                    | neg                          |                   |                                        |     |     | 11                  | 141/153                      | 196/200 | 182/190 | 268/294 |         |         |         |         |         |
|                         |                  |                        | 1418        | 11-Dec-07                    | neg                          |                   |                                        |     |     |                     | 11                           | 141/153 | 196/200 | 182/190 | 268/294 |         |         |         |         |
|                         |                  |                        | 1413        | 15-Jan-08                    | neg                          |                   |                                        |     |     |                     | 11                           | 141/153 | 196/200 | 182/190 | 268/294 |         |         |         |         |
|                         |                  |                        | 1338        | 12-Mar-08                    | neg                          |                   |                                        |     |     |                     | 11                           | 141/153 | 196/200 | 182/190 | 268/294 |         |         |         |         |
|                         |                  |                        | 1463        | 28-Nov-08                    | neg                          |                   |                                        |     |     |                     | 11                           | 141/153 | 196/200 | 182/190 | 268/294 | 244/264 | 318/322 | 237/241 | 287/295 |
|                         |                  |                        | 1633        | 20-Jul-09                    | neg                          |                   |                                        |     |     |                     | 11                           | 141/153 | 196/200 | 182/190 | 268/294 | 244/264 | 318/322 | 237/241 | 287/295 |
|                         |                  |                        | 1734        | 28-Jul-09                    | neg                          |                   |                                        |     |     |                     | 11                           | 141/153 | 196/200 | 182/190 | 268/294 | 244/264 | 318/322 | 237/241 | 287/295 |
|                         |                  |                        | 1683        | 13-Aug-09                    | neg                          |                   |                                        |     |     |                     | 11                           | 141/153 | 196/200 | 182/190 | 268/294 | 244/264 | 318/322 | 237/241 | 287/295 |
|                         |                  |                        | 1736        | 22-Dec-09                    | neg                          |                   |                                        |     |     |                     | 11                           | 141/153 | 196/200 | 182/190 | 268/294 | 244/264 | 318/322 | 237/241 | 287/295 |
|                         |                  |                        | Ch-118      | M                            | KL                           | 1464              | 14-Oct-08                              | pos | neg |                     |                              |         | 13      | 141/177 | 231/235 | 182/190 | 290/298 | 256/256 | 322/322 |
| Ch-121                  | F                | KL                     | 1662        | 22-Nov-09                    | pos                          | neg               |                                        |     |     | 13                  | 141/161                      | 200/235 | 182/190 | 286/302 |         |         |         | 279/283 |         |

<sup>1</sup>Black, uninfected; red, SIVcpz infected. Some results in this table have been reported previously [2], but are included for completion; new data are highlighted in bold face.

<sup>2</sup>F, female; M, male.

<sup>3</sup>Resident community of the chimpanzee. KL, Kalande; MT, Mitumba; KK, Kasekela.

<sup>4</sup>na, not available.

<sup>5</sup>pos, positive; neg, negative.

<sup>6</sup>Previously reported Genbank Accession numbers are italicized.

<sup>7</sup>Numbers indicate mtDNA haplotypes as previously reported [2].

<sup>8</sup>Sample 1304 from Ch-088 was previously misidentified to represent Ch-108 [2].

<sup>9</sup>Unlike previously reported [2], Ch-108 did not permanently emigrate to KK on 25-Mar-06.
