# Supplementary material for: Impact of Simian Immunodeficiency Virus Infection on Chimpanzee Population Dynamics
Source: PubMed Central journal article supplement (PMC2944804; doi:10.1371/journal.ppat.1001116), 2010-09-23
Supplement: ppat.1001116.s003.pdf [file ppat.1001116.s003.pdf]

**Table S2.** Non-invasive testing of Kasekela and Mitumba chimpanzees for SIVcpz infection.<sup>1</sup>

| Individual <sup>2</sup> | Sex <sup>3</sup> | Comm-<br>unity <sup>4</sup> | Sample Code | Collection Date | SIVcpz<br>fecal WB <sup>5</sup> | mtDNA<br>haplotype <sup>6</sup> | Microsatellite Loci |         |         |         |
|-------------------------|------------------|-----------------------------|-------------|-----------------|---------------------------------|---------------------------------|---------------------|---------|---------|---------|
|                         |                  |                             |             |                 |                                 |                                 | D18s536             | D4s243  | D10s676 | D9s922  |
| Ch-001                  | F                | KK                          | 1537        | 15-Feb-09       | neg                             | 1                               | 141/161             | 204/235 | 182/190 | 286/302 |
|                         |                  | KK                          | 1555        | 9-Apr-09        | neg                             | 1                               | 141/161             | 204/235 | 182/190 | 286/302 |
|                         |                  | KK                          | 1637        | 11-Oct-09       | neg                             |                                 | 141/161             | 204/235 | 182/190 | 286/302 |
| Ch-002                  | F                | KK                          | 1533        | 18-Feb-09       | neg                             | 7                               | 141/161             | 204/231 | 182/190 | 302/302 |
|                         |                  | KK                          | 1781        | 18-Oct-09       | neg                             |                                 | 141/161             | 204/231 | 182/190 | 302/302 |
| Ch-003                  | M                | KK                          | 1759        | 9-Oct-09        | neg                             |                                 | 141/157             | 204/204 | 186/190 | 270/294 |
| Ch-004                  | M                | KK                          | 1650        | 10-Sep-09       | pos                             | 6                               | 141/161             | 200/235 | 182/182 | 286/302 |
|                         |                  | KK                          | 1713        | 2-Oct-09        | pos                             | 6                               | 141/161             | 200/235 | 182/182 | 286/302 |
|                         |                  | KK                          | 1654        | 19-Nov-09       | pos                             | 6                               | 141/161             | 200/235 | 182/182 | 286/302 |
| Ch-005                  | M                | KK                          | 1780        | 2-Oct-09        | neg                             |                                 | 141/157             | 196/200 | 182/194 |         |
| Ch-007                  | M                | KK                          | 1718        | 7-Sep-09        | neg                             |                                 | 141/141             | 196/235 | 158/190 | 298/298 |
|                         |                  | KK                          | 1659        | 23-Nov-09       | neg                             |                                 | 141/141             | 196/235 | 158/190 | 298/298 |
| Ch-009                  | F                | KK                          | 1559        | 2-Jul-09        | neg                             | 6                               | 141/173             | 196/200 | 190/194 | 302/306 |
|                         |                  | KK                          | 1743        | 3-Sep-09        | neg                             |                                 | 141/173             | 196/200 | 190/194 | 302/306 |
|                         |                  | KK                          | 1679        | 23-Oct-09       | neg                             |                                 | 141/173             | 196/200 | 190/194 |         |
| Ch-010                  | M                | KK                          | 1534        | 15-Jan-09       | neg                             | 6                               | 141/161             | 200/235 | 182/194 | 286/302 |
|                         |                  | KK                          | 1631        | 2-Oct-09        | neg                             | 6                               |                     |         |         |         |
| Ch-012                  | F                | KK                          | 1545        | 20-Apr-09       | neg                             | 6                               | 141/173             | 196/200 | 182/194 | 298/302 |
|                         |                  | KK                          | 1717        | 21-Oct-09       | neg                             |                                 | 141/173             | 196/200 | 182/194 | 298/302 |
| Ch-013                  | M                | KK                          | 1605        | 10-Sep-09       | neg                             |                                 | 141/173             | 200/204 | 182/194 | 302/302 |
|                         |                  | KK                          | 1599        | 11-Sep-09       | neg                             |                                 | 141/173             | 200/204 | 182/194 | 302/302 |
|                         |                  | KK                          | 1612        | 2-Oct-09        | neg                             |                                 | 141/173             |         | 182/194 |         |
|                         |                  | KK                          | 1752        | 7-Oct-09        | neg                             |                                 | 141/173             | 200/204 | 182/194 | 302/302 |
| Ch-014                  | M                | KK                          | 1558        | 18-Jun-09       | neg                             | 6                               | 141/161             | 196/200 | 186/190 | 290/306 |
|                         |                  | KK                          | 1653        | 8-Dec-09        | neg                             | 6                               | 141/161             | 196/200 | 186/190 | 290/306 |
| Ch-015                  | F                | KK                          | 1536        | 27-Jan-09       | neg                             | 1                               | 141/161             | 235/235 | 182/190 | 286/298 |
|                         |                  | KK                          | 1535        | 15-Feb-09       | neg                             | 1                               | 141/161             | 235/235 | 182/190 | 286/298 |
|                         |                  | KK                          | 1604        | 4-Oct-09        | neg                             |                                 | 141/161             | 235/235 | 182/190 | 286/298 |
|                         |                  | KK                          | 1693        | 22-Oct-09       | neg                             |                                 | 141/161             | 235/235 | 182/190 | 286/298 |
| Ch-017                  | F                | KK                          | 1782        | 3-Sep-09        | neg                             |                                 | 141/173             | 200/204 | 182/194 | 302/306 |
|                         |                  | KK                          | 1755        | 7-Sep-09        | neg                             |                                 | 141/173             |         | 182/194 | 302/306 |
|                         |                  | KK                          | 1636        | 9-Oct-09        | neg                             |                                 | 141/173             | 200/204 | 182/194 |         |
|                         |                  | KK                          | 1741        | ??-??-09        | neg                             | 1                               | 141/173             | 200/204 | 182/194 | 302/306 |
| Ch-018                  | F                | KK                          | 1714        | 11-Oct-09       | neg                             |                                 | 141/161             | 235/235 | 190/190 | 286/302 |
| Ch-019                  | F                | KK                          | 1547        | 22-Apr-09       | neg                             | 11                              | 153/157             | 204/235 | 186/190 | 290/298 |
|                         |                  | KK                          | 1657        | 9-Dec-09        | neg                             |                                 | 153/157             | 204/235 | 186/190 | 290/298 |
| Ch-020                  | M                | KK                          | 1539        | 19-Jan-09       | neg                             | 12                              | 141/141             | 196/231 | 182/190 | 290/302 |
|                         |                  | KK                          | 1709        | 9-Oct-09        | neg                             |                                 | 141/141             | 196/231 | 182/190 | 290/302 |
| Ch-021                  | F                | KK                          | 1602        | 12-Aug-09       | pos                             |                                 | 161/177             | 204/204 | 182/186 | 294/302 |
| Ch-022                  | F                | KK                          | 1565        | 19-Jun-09       | pos                             | 7                               | 157/161             | 196/196 | 182/182 | 286/294 |
|                         |                  | KK                          | 1715        | 6-Oct-09        | pos                             |                                 | 157/161             | 196/196 | 182/182 | 286/294 |
| Ch-023                  | M                | KK                          | 1567        | 15-May-09       | neg                             | 9                               | 141/161             | 235/235 | 182/190 | 286/298 |
|                         |                  | KK                          | 1594        | 10-Oct-09       | neg                             |                                 | 141/161             | 235/235 | 182/190 | 286/298 |
| Ch-025                  | F                | KK                          | 1622        | 12-Aug-09       | neg                             |                                 | 157/173             | 231/231 | 186/190 | 286/302 |
|                         |                  | KK                          | 1703        | 27-Sep-09       | neg                             |                                 | 157/173             | 231/231 | 186/190 | 286/302 |
|                         |                  | KK                          | 1742        | 11-Oct-09       | neg                             |                                 | 157/173             | 231/231 | 186/190 | 286/302 |
| Ch-026                  | F                | KK                          | 1544        | 16-Jan-09       | neg                             | 5                               | 153/161             | 196/235 | 186/186 | 286/298 |
|                         |                  | KK                          | 1548        | 15-Apr-09       | neg                             | 5                               | 153/161             | 196/235 | 186/186 | 286/298 |
|                         |                  | KK                          | 1571        | 18-May-09       | neg                             | 5                               | 153/161             | 196/235 | 186/186 | 286/298 |
|                         |                  | KK                          | 1758        | 12-Oct-09       | neg                             |                                 | 153/161             | 196/235 | 186/186 | 286/298 |
| Ch-027                  | M                | KK                          | 1572        | 4-May-09        | neg                             | 5                               | 141/161             | 196/200 | 186/186 | 286/290 |
|                         |                  | KK                          | 1648        | 8-Sep-09        | neg                             |                                 | 141/161             | 196/200 | 186/186 | 286/290 |
|                         |                  | KK                          | 1677        | 5-Dec-09        | neg                             |                                 | 141/161             | 196/200 | 186/186 |         |
| Ch-029                  | F                | KK                          | 1611        | 5-Aug-09        | neg                             |                                 | 141/161             | 196/196 | 182/190 | 294/302 |
|                         |                  | KK                          | 1704        | 16-Oct-09       | neg                             |                                 | 141/161             | 196/196 | 182/190 | 294/302 |
| Ch-031                  | F                | KK                          | 1543        | 22-Jan-09       | neg                             | 5                               | 157/161             | 196/231 | 182/186 | 286/302 |
|                         |                  | KK                          | 1574        | 8-Apr-09        | neg                             | 5                               | 157/161             | 196/231 | 182/186 | 286/302 |
|                         |                  | KK                          | 1575        | 17-Jun-09       | neg                             | 5                               | 157/161             | 196/231 | 182/186 | 286/302 |
|                         |                  | KK                          | 1763        | 12-Oct-09       | neg                             |                                 | 157/161             | 196/231 | 182/186 |         |
| Ch-032                  | F                | KK                          | 1577        | 14-May-09       | neg                             | 11                              | 161/173             | 196/200 | 190/190 | 302/306 |
|                         |                  | KK                          | 1702        | 16-Sep-09       | neg                             |                                 | 161/173             | 196/200 | 190/190 | 302/306 |
|                         |                  | KK                          | 1638        | 9-Oct-09        | neg                             |                                 | 161/173             | 196/200 | 190/190 | 302/306 |
| Ch-034                  | M                | KK                          | 1579        | 22-Jun-09       | neg                             |                                 |                     | 200/204 | 190/194 | 268/302 |
|                         |                  | KK                          | 1610        | 24-Oct-09       | neg                             |                                 | 169/173             | 200/204 | 190/194 | 268/302 |

| Individual <sup>2</sup> | Sex <sup>3</sup> | Comm-<br>unity <sup>4</sup> | Sample Code | Collection Date | SIVcpz<br>fecal WB <sup>5</sup> | mtDNA<br>haplotype <sup>6</sup> | Microsatellite Loci |         |         |         |
|-------------------------|------------------|-----------------------------|-------------|-----------------|---------------------------------|---------------------------------|---------------------|---------|---------|---------|
|                         |                  |                             |             |                 |                                 |                                 | D18s536             | D4s243  | D10s676 | D9s922  |
| Ch-035                  | M                | KK                          | 1627        | 10-Oct-09       | neg                             |                                 | 153/161             | 204/235 | 182/186 | 286/298 |
| Ch-039                  | F                | MT                          | 1778        | 19-Aug-09       | pos                             | 12                              | 141/153             | 200/204 | 186/186 | 286/298 |
|                         |                  | MT                          | 1626        | 4-Sep-09        | pos                             | 12                              | 141/153             | 200/204 | 186/186 | 286/298 |
|                         |                  | MT                          | 1764        | 3-Oct-09        | pos                             | 12                              | 141/153             | 200/204 | 186/186 | 286/298 |
| Ch-039                  | F                | MT                          | 1716        | 4-Oct-09        | pos                             | 12                              | 141/153             | 200/204 | 186/186 | 286/298 |
|                         |                  | MT                          | 1642        | 13-Oct-09       | pos                             | 12                              | 141/153             | 200/204 | 186/186 | 286/298 |
| Ch-042                  | F                | MT                          | 1667        | 14-Nov-09       | neg                             | 2                               | 141/173             | 200/235 | 190/190 | 286/294 |
|                         |                  | MT                          | 1666        | ??-??-09        | neg                             |                                 | 141/173             |         | 190/190 | 286/294 |
| Ch-044                  | F                | MT                          | 1721        | 10-Aug-09       | neg                             |                                 | 157/173             | 231/235 | 186/190 | 286/302 |
|                         |                  | MT                          | 1720        | 28-Oct-09       | neg                             |                                 | 157/173             | 231/235 | 186/190 | 286/302 |
|                         |                  | MT                          | 1652        | 8-Nov-09        | neg                             |                                 | 157/173             | 231/235 | 186/190 | 286/302 |
| Ch-046                  | F                | MT                          | 1733        | 8-Dec-09        | neg                             |                                 | 141/161             | 204/235 | 190/194 | 298/306 |
|                         |                  | MT                          | 1671        | 10-Dec-09       | neg                             |                                 | 141/161             | 204/235 | 190/194 | 298/306 |
|                         |                  | MT                          | 1710        | ??-??-09        | neg                             |                                 | 141/161             | 204/235 | 190/194 | 298/306 |
| Ch-047                  | F                | MT                          | 1591        | 10-Aug-09       | neg                             |                                 |                     |         | 182/190 | 302/302 |
|                         |                  | MT                          | 1768        | 15-Sep-09       | neg                             |                                 | 141/161             | 196/204 | 182/190 | 302/302 |
|                         |                  | MT                          | 1658        | 3-Dec-09        | neg                             |                                 | 141/161             | 196/204 | 182/190 | 302/302 |
|                         |                  | MT                          | 1674        | 6-Dec-09        | neg                             |                                 | 141/161             | 196/204 | 182/190 | 302/302 |
| Ch-048                  | M                | MT                          | 1568        | 10-Jul-09       | pos                             | 13                              | 161/173             | 231/235 | 186/190 | 302/306 |
|                         |                  | MT                          | 1697        | 30-Sep-09       | pos                             | 13                              | 161/173             | 231/235 | 186/190 | 302/306 |
|                         |                  | MT                          | 1747        | 7-Nov-09        | pos                             | 13                              | 161/173             | 231/235 | 186/190 | 302/306 |
| Ch-049                  | F                | MT                          | 1777        | 26-Aug-09       | neg                             |                                 | 141/153             | 196/235 | 190/190 | 298/302 |
|                         |                  | MT                          | 1615        | 19-Oct-09       | neg                             |                                 | 141/153             | 196/235 | 190/190 | 298/302 |
|                         |                  | MT                          | 1670        | 18-Nov-09       | neg                             |                                 | 141/153             |         | 190/190 | 298/302 |
|                         |                  | MT                          | 1676        | 18-Dec-09       | neg                             | 11                              | 141/153             | 196/235 | 190/190 |         |
| Ch-050                  | F                | KK                          | 1744        | 2-Oct-09        | neg                             |                                 | 141/141             | 200/204 | 186/186 | 302/306 |
| Ch-051                  | M                | KK                          | 1560        | 26-Jun-09       | neg                             | 6                               | 141/161             | 200/200 | 186/190 | 290/306 |
|                         |                  | KK                          | 1746        | 28-Jun-09       | neg                             |                                 | 141/161             | 200/200 | 186/190 | 290/306 |
|                         |                  | KK                          | 1762        | 11-Oct-09       | neg                             |                                 | 141/161             | 200/200 | 186/190 | 290/306 |
| Ch-052                  | M                | KK                          | 1541        | 19-Feb-09       | pos                             | 3                               | 141/173             | 200/204 | 186/194 |         |
|                         |                  | KK                          | 1551        | 8-Apr-09        | pos                             | 3                               | 141/173             | 200/204 | 186/194 | 298/302 |
|                         |                  | KK                          | 1760        | 11-Sep-09       | pos                             | 3                               | 141/173             | 200/204 | 186/194 | 298/302 |
|                         |                  | KK                          | 1753        | 2-Oct-09        | pos                             | 3                               | 141/173             | 200/204 | 186/194 | 298/302 |
| Ch-053                  | F                | KK                          | 1632        | 4-Oct-09        | neg                             |                                 | 141/173             | 204/204 | 182/190 |         |
| Ch-054                  | M                | KK                          | 1573        | 23-Jun-09       | neg                             | 5                               | 141/157             | 231/235 | 158/186 | 286/298 |
|                         |                  | KK                          | 1643        | 2-Oct-09        | neg                             |                                 | 141/157             | 231/235 | 158/186 | 286/298 |
| Ch-055                  | F                | KK                          | 1688        | 10-Sep-09       | neg                             | 8                               | 157/161             | 200/204 | 182/186 | 298/302 |
|                         |                  | KK                          | 1655        | 21-Nov-09       | neg                             | 8                               |                     | 200/204 |         |         |
| Ch-056                  | M                | KK                          | 1651        | 3-Aug-09        | neg                             |                                 | 157/173             | 204/231 | 182/194 | 286/302 |
|                         |                  | KK                          | 1630        | 11-Oct-09       | neg                             |                                 | 157/173             | 204/231 | 182/194 | 286/302 |
| Ch-057                  | F                | KK                          | 1748        | 15-Oct-09       | neg                             |                                 | 141/161             | 231/235 | 190/190 | 286/302 |
| Ch-058                  | M                | KK                          | 1694        | 11-Oct-09       | neg                             |                                 | 141/173             | 200/200 | 182/190 | 268/302 |
| Ch-059                  | M                | MT                          | 1707        | 13-Aug-09       | neg                             |                                 | 141/141             | 196/235 | 186/190 | 298/306 |
|                         |                  | MT                          | 1765        | 4-Sep-09        | pos                             | 11                              | 141/141             | 196/235 | 186/190 | 298/306 |
|                         |                  | MT                          | 1757        | 1-Oct-09        | neg                             |                                 | 141/141             | 196/235 | 186/190 | 298/306 |
|                         |                  | MT                          | 1689        | 6-Nov-09        | neg                             | 11                              | 141/141             | 196/235 | 186/190 | 298/306 |
| Ch-060                  | M                | MT                          | 1673        | 3-Dec-09        | neg                             | 11                              | 141/141             | 196/235 | 186/190 | 298/306 |
|                         |                  | KK                          | 1578        | 1-Jul-09        | neg                             | 11                              | 141/161             | 196/231 | 190/190 | 290/302 |
|                         |                  | KK                          | 1761        | 5-Aug-09        | neg                             |                                 | 141/161             |         | 190/190 | 290/302 |
|                         |                  | KK                          | 1617        | 3-Oct-09        | neg                             |                                 | 141/161             | 196/231 | 190/190 | 290/302 |
| Ch-061                  | F                | KK                          | 1644        | 8-Oct-09        | neg                             |                                 | 141/161             | 196/231 | 190/190 | 290/302 |
|                         |                  | KK                          | 1603        | ??-??-09        | neg                             |                                 | 141/161             | 196/231 | 190/190 | 290/302 |
|                         |                  | KK                          | 1625        | 2-Sep-09        | neg                             |                                 | 141/141             | 196/204 | 182/186 | 290/306 |
|                         |                  | KK                          | 1754        | 4-Oct-09        | neg                             |                                 | 141/141             | 196/204 | 182/186 | 290/306 |
| Ch-063                  | M                | MT                          | 1607        | 13-Aug-09       | neg                             |                                 | 161/173             | 200/204 | 182/190 | 294/298 |
|                         |                  | MT                          | 1725        | 29-Sep-09       | neg                             |                                 | 161/173             | 200/204 | 182/190 | 294/298 |
|                         |                  | MT                          | 1628        | 13-Oct-09       | neg                             |                                 | 161/173             | 200/204 | 182/190 | 294/298 |
| Ch-065                  | M                | MT                          | 1698        | 31-Aug-09       | neg                             |                                 | 141/141             | 231/235 | 190/190 | 302/306 |
|                         |                  | MT                          | 1771        | 4-Sep-09        | neg                             |                                 | 141/141             | 231/235 | 190/190 |         |
|                         |                  | MT                          | 1783        | 3-Oct-09        | neg                             |                                 | 141/141             | 231/235 | 190/190 | 302/306 |
|                         |                  | MT                          | 1684        | 5-Nov-09        | neg                             | 6                               | 141/141             |         |         |         |
|                         |                  | MT                          | 1669        | 3-Dec-09        | neg                             |                                 | 141/141             | 231/235 | 190/190 | 302/306 |
| Ch-066                  | F                | MT                          | 1773        | 15-Aug-09       | neg                             |                                 | 161/177             | 200/235 | 182/190 |         |
|                         |                  | MT                          | 1589        | 3-Oct-09        | neg                             |                                 | 161/177             | 200/235 | 182/190 | 306/306 |
|                         |                  | MT                          | 1719        | 3-Nov-09        | neg                             |                                 | 161/177             |         | 182/190 | 306/306 |
|                         |                  | MT                          | 1663        | 18-Dec-09       | neg                             |                                 | 161/177             | 200/235 | 182/190 | 306/306 |

Table S2

| Individual <sup>2</sup> | Sex <sup>3</sup> | Comm-unity <sup>4</sup> | Sample Code | Collection Date | SIVcpz fecal WB <sup>5</sup> | mtDNA haplotype <sup>6</sup> | Microsatellite Loci |         |         |         |
|-------------------------|------------------|-------------------------|-------------|-----------------|------------------------------|------------------------------|---------------------|---------|---------|---------|
|                         |                  |                         |             |                 |                              |                              | D18s536             | D4s243  | D10s676 | D9s922  |
| Ch-067                  | M                | MT                      | 1732        | 15-Dec-09       | neg                          |                              | 141/161             | 196/200 | 182/190 | 302/302 |
| Ch-068                  | M                | MT                      | 1557        | 10-Jul-09       | neg                          | 6                            | 141/161             | 200/235 | 182/194 | 268/306 |
|                         |                  | MT                      | 1682        | 4-Oct-09        | neg                          |                              | 141/161             |         | 182/194 | 268/306 |
| Ch-073                  | F                | KK                      | 1708        | 8-Sep-09        | neg                          |                              | 141/173             | 204/231 | 186/194 | 302/302 |
| Ch-075                  | M                | MT                      | 1634        | 3-Sep-09        | neg                          |                              | 141/161             | 200/235 | 182/182 | 302/306 |
|                         |                  | MT                      | 1616        | 3-Nov-09        | neg                          |                              | 141/161             | 200/235 | 182/182 |         |
| Ch-076                  | F                | MT                      | 1774        | 23-Oct-09       | neg                          |                              | 141/153             | 200/204 | 182/182 |         |
|                         |                  | MT                      | 1660        | 8-Dec-09        | neg                          |                              | 141/153             | 200/204 | 182/182 | 268/302 |
| Ch-077                  | M                | KK                      | 1561        | 27-Jun-09       | neg                          | 1                            | 141/161             | 204/204 | 182/186 | 286/294 |
|                         |                  | KK                      | 1647        | 8-Oct-09        | neg                          |                              | 141/161             | 204/204 | 182/186 | 286/294 |
|                         |                  | KK                      | 1706        | 21-Oct-09       | neg                          |                              | 141/161             | 204/204 | 182/186 | 286/294 |
| Ch-078                  | F                | KK                      | 1556        | 2-Jul-09        | neg                          | 12                           | 141/153             | 204/204 | 186/186 | 286/298 |
|                         |                  | KK                      | 1624        | 5-Aug-09        | neg                          |                              | 141/153             | 204/204 | 186/186 | 286/298 |
|                         |                  | KK                      | 1620        | 9-Oct-09        | neg                          |                              | 141/153             | 204/204 | 186/186 | 286/298 |
| Ch-079                  | F                | KK                      | 1566        | 8-Jul-09        | neg                          | 13                           | 141/141             | 204/235 | 190/190 | 290/302 |
|                         |                  | KK                      | 1701        | 11-Oct-09       | neg                          | 13                           | 141/141             | 204/235 | 190/190 |         |
| Ch-080                  | F                | KK                      | 1629        | 3-Oct-09        | pos                          |                              | 141/157             | 204/204 | 182/186 | 298/298 |
| Ch-090                  | M                | KK                      | 1623        | 16-Oct-09       | neg                          |                              | 141/141             | 204/231 | 186/190 | 290/298 |
|                         |                  | KK                      | 1749        | ??-??-09        | neg                          |                              | 141/141             | 204/231 | 186/190 |         |
| Ch-094                  | F                | MT                      | 1656        | 15-Dec-09       | neg                          |                              | 157/173             | 231/235 | 186/190 | 302/302 |
| Ch-096                  | F                | KK                      | 1569        | 17-Jun-09       | neg                          |                              | 153/161             | 200/200 | 182/182 | 268/298 |
|                         |                  | KK                      | 1680        | 10-Oct-09       | neg                          |                              | 153/161             | 200/200 | 182/182 | 268/298 |
|                         |                  | KK                      | 1646        | 23-Oct-09       | neg                          |                              | 153/161             | 200/200 | 182/182 | 268/298 |
| Ch-098                  | F                | MT                      | 1593        | 30-Jul-09       | neg                          |                              |                     |         | 182/190 | 298/302 |
|                         |                  | MT                      | 1686        | 23-Sep-09       | neg                          |                              | 141/157             | 235/235 | 182/190 | 298/302 |
|                         |                  | MT                      | 1711        | 1-Oct-09        | neg                          |                              | 141/157             | 235/235 | 182/190 | 298/302 |
|                         |                  | MT                      | 1726        | 3-Nov-09        | neg                          |                              | 141/157             | 235/235 | 182/190 | 298/302 |
|                         |                  | MT                      | 1687        | ??-??-09        | neg                          | 8                            | 141/157             | 235/235 | 182/190 | 298/302 |
| Ch-101                  | F                | KK                      | 1769        | 30-Jul-09       | neg                          |                              | 161/177             | 196/196 |         | 290/302 |
| Ch-102                  | F                | KK                      | 1580        | 18-Jun-09       | neg                          | 6                            | 141/161             | 200/200 | 186/190 | 286/302 |
|                         |                  | KK                      | 1691        | 23-Sep-09       | neg                          | 6                            | 141/161             | 200/200 | 186/190 | 286/302 |
|                         |                  | KK                      | 1609        | ??-??-09        | neg                          | 6                            | 141/161             | 200/200 | 186/190 |         |
| Ch-103                  | F                | KK                      | 1546        | 29-Apr-09       | neg                          | 3                            | 161/161             | 204/235 | 186/190 | 298/302 |
|                         |                  | KK                      | 1640        | 18-Aug-09       | neg                          | 3                            | 161/161             | 204/235 | 186/190 | 298/302 |
|                         |                  | KK                      | 1598        | 25-Aug-09       | pos                          | 3                            | 161/161             | 204/235 | 186/190 | 298/302 |
|                         |                  | KK                      | 1675        | 2-Dec-09        | neg                          | 3                            | 161/161             | 204/235 | 186/190 | 298/302 |
| Ch-105                  | F                | KK                      | 1745        | 23-Sep-09       | neg                          |                              | 141/141             | 235/235 | 158/182 | 298/302 |
|                         |                  | KK                      | 1595        | 10-Oct-09       | neg                          |                              | 141/141             | 235/235 | 158/182 | 298/302 |
| Ch-111                  | F                | MT                      | 1639        | ??-??-09        | neg                          |                              | 141/141             | 200/235 | 182/190 | 268/302 |
|                         |                  | MT                      | 1772        | ??-??-09        | neg                          |                              | 141/141             | 200/235 | 182/190 | 268/302 |
| Ch-112                  | F                | MT                      | 1590        | 9-Oct-09        | neg                          |                              | 141/173             | 235/235 | 190/190 | 306/306 |
|                         |                  | MT                      | 1668        | 8-Dec-09        | neg                          |                              | 141/173             | 235/235 | 190/190 | 306/306 |
| Ch-113                  | M                | MT                      | 1661        | 25-Nov-09       | neg                          |                              | 153/161             | 200/204 | 182/182 | 268/268 |
| Ch-114                  | F                | KK                      | 1576        | 14-May-09       | neg                          | 11                           | 141/173             | 196/235 | 182/190 | 286/306 |
|                         |                  | KK                      | 1608        | 15-Oct-09       | neg                          |                              | 141/173             | 196/235 | 182/190 |         |
| Ch-115                  | M                | KK                      | 1550        | 24-Apr-09       | neg                          | 3                            | 141/161             | 204/204 | 186/190 | 302/306 |
|                         |                  | KK                      | 1770        | 3-Oct-09        | neg                          |                              | 141/161             | 204/204 | 186/190 | 302/306 |
| Ch-116                  | M                | KK                      | 1540        | 8-Feb-09        | neg                          | 5                            | 141/157             | 196/231 | 190/190 | 286/298 |
|                         |                  | KK                      | 1750        | 12-Aug-09       | neg                          |                              | 141/157             | 196/231 | 190/190 |         |
|                         |                  | KK                      | 1690        | 29-Sep-09       | neg                          | 5                            | 141/157             | 196/231 | 190/190 | 286/298 |
|                         |                  | KK                      | 1678        | 19-Oct-09       | neg                          |                              | 141/157             | 196/231 | 190/190 | 286/298 |
|                         |                  | KK                      | 1641        | 22-Oct-09       | neg                          |                              | 141/157             | 196/231 | 190/190 | 286/298 |
| Ch-117                  | F                | KK                      | 1538        | 20-Jan-09       | neg                          | 11                           | 153/161             | 204/204 | 186/190 | 286/298 |
|                         | F                | KK                      | 1564        | 16-Jun-09       | neg                          | 11                           | 153/161             | 204/204 | 186/190 | 286/298 |
|                         |                  | KK                      | 1664        | 8-Dec-09        | neg                          |                              | 153/161             | 204/204 | 186/190 | 286/298 |
| Ch-119                  | M                | KK                      | 1552        | 26-Mar-09       | neg                          | 4                            | 141/141             | 196/235 | 182/182 | 290/298 |
| Ch-120                  | F                | KK                      | 1570        | 12-Jun-09       | neg                          | 5                            | 141/153             | 196/235 |         | 298/298 |
|                         |                  | KK                      | 1700        | 15-Sep-09       | neg                          | 5                            | 141/153             | 196/235 | 158/186 | 298/298 |
| Ch-122                  |                  | MT                      | 1665        | 5-Dec-09        | neg                          | 1                            | 161/177             | 235/235 | 182/190 | 306/306 |
| Ch-123                  |                  | KK                      | 1775        | 1-Oct-09        | neg                          | 6                            | 141/161             | 200/235 | 182/190 | 286/302 |

<sup>1</sup>Results of samples collected from 01-Jan-09 to 31-Dec-09 are shown. Results for all samples collected previously are reported in [2].

<sup>2</sup>Black, SIVcpz uninfected; red, SIVcpz infected.

<sup>3</sup>F, female; M, male.

<sup>4</sup>Resident community of the chimpanzee. MT, Mitumba; KK, Kasekela.

<sup>5</sup>pos, positive; neg, negative.

<sup>6</sup>Numbers indicate mtDNA haplotypes as previously reported [2].
