# Supplementary material for: Impact of Simian Immunodeficiency Virus Infection on Chimpanzee Population Dynamics
Source: PubMed Central journal article supplement (PMC2944804; doi:10.1371/journal.ppat.1001116), 2010-09-23
Supplement: ppat.1001116.s004.pdf [file ppat.1001116.s004.pdf]

Table S3. Kalande demographics.

| ID <sup>1</sup> | Sex <sup>2</sup> | Mother ID <sup>3</sup> | Possible birth year | Year of departure from Kalande <sup>4</sup> | Kalande membership <sup>5</sup> |      |      |      |      |      |      |      |      |      |      |      |     | Cause of departure     | Cause of death             | Evidence for existence               | Comments                                                                                                                                         |
|-----------------|------------------|------------------------|---------------------|---------------------------------------------|---------------------------------|------|------|------|------|------|------|------|------|------|------|------|-----|------------------------|----------------------------|--------------------------------------|--------------------------------------------------------------------------------------------------------------------------------------------------|
|                 |                  |                        |                     |                                             | 1998                            | 1999 | 2000 | 2001 | 2002 | 2003 | 2004 | 2005 | 2006 | 2007 | 2008 | 2009 |     |                        |                            |                                      |                                                                                                                                                  |
| KLAM1           | M                | unk.                   | 1968                | 1998                                        | KL?                             | D    | D    | D    | D    | D    | D    | D    | D    | D    | D    | D    | D   | Death                  | Killed by people? Disease? | Body found                           | Dead male found on Nyamagoma beach with hands and genitals cut off, Jul/Aug-98. [15]                                                             |
| Ch-033          | F                | unk.                   | 1985                | 1998                                        | KL                              | KK   | KK   | KK   | KK   | KK   | KK   | KK   | KK   | KK   | KK   | KK   | KK  | Emigration             | Unknown                    | Visual identification and genotype   | Emigrated to Kasekela by 6-Feb-98; last seen 02-March-08.                                                                                        |
| KLSM1           | M                | unk.                   | 1988                | 1998                                        | KL                              | D    | D    | D    | D    | D    | D    | D    | D    | D    | D    | D    | D   | Death                  | Intergroup Aggression      | Visual identification                | Attacked and probably killed in Aug-98 [45]                                                                                                      |
| KL11            | unk              | unk.                   | 1996                | 1998                                        | KL                              | D    | D    | D    | D    | D    | D    | D    | D    | D    | D    | D    | D   | Death                  | Intergroup Aggression      | Visual identification                | Killed by Kasekela males Oct-98 [45]                                                                                                             |
| KLAF1           | F                | unk.                   | 1968                | 1998/1999                                   | KL?                             | KL?  | D    | D    | D    | D    | D    | D    | D    | D    | D    | D    | D   | Death?                 | Killed by people? Disease? | Verbal report                        | "2 dead females outside the Park (Ngerwe 1998/99), reported from villagers" [15]                                                                 |
| KLAF2           | F                | unk.                   | 1969                | 1998/1999                                   | KL?                             | KL?  | D    | D    | D    | D    | D    | D    | D    | D    | D    | D    | D   | Death?                 | Killed by people? Disease? | Verbal report                        | "2 dead females outside the Park (Ngerwe 1998/99), reported from villagers" [15]                                                                 |
| KLAF3           | F                | unk.                   | 1969                | 1999                                        | KL?                             | KL?  | D    | D    | D    | D    | D    | D    | D    | D    | D    | D    | D   | Death                  | Killed by people? Disease? | Body found                           | Decomposing female found on Bwavi beach in Feb-99. Cause of death not clear. Around the same time an infant was offered for sale in Kigoma. [15] |
| KL12            | unk              | unk.                   | 1997                | 1999                                        | KL?                             | KL?  | D    | D    | D    | D    | D    | D    | D    | D    | D    | D    | D   | Death?                 | Killed by people?          | Verbal report                        | Infant reported for sale in Kigoma market Feb-99, possible infant of mother on beach [15]                                                        |
| Ch-029          | F                | unk.                   | 1978                | 2000                                        | KL                              | KL   | KL   | KK   | KK   | KK   | KK   | KK   | KK   | KK   | KK   | KK   | KK  | Emigration             | Alive                      | Visual identification and genotype   | Emigrated to Kasekela by 14-Aug-00.                                                                                                              |
| Ch-022          | F                | unk.                   | 1988                | 2000                                        | KL?                             | KL?  | KL?  | KK   | KK   | KK   | KK   | KK   | KK   | KK   | KK   | KK   | KK  | Emigration             | Alive                      | Visual identification and genotype   | Emigrated to Kasekela by 01-Oct-00.                                                                                                              |
| Ch-076          | F                | unk.                   | 1986                | 2001                                        | KL?                             | KL?  | KL?  | KL?  | MT   | MT   | MT   | MT   | MT   | MT   | MT   | MT   | MT  | Emigration             | Alive                      | Visual identification and genotype   | Emigrated to Mitumba by 28-May-01.                                                                                                               |
| KLAM2           | M                | unk.                   | 1962                | 2002                                        | KL                              | KL   | KL   | KL   | KL   | D    | D    | D    | D    | D    | D    | D    | D   | Death                  | Disease                    | Visual identification                | Thin old male, last seen during respiratory outbreak.                                                                                            |
| KLAF4           | F                | unk.                   | 1972                | 2002                                        | KL?                             | KL?  | KL?  | KL?  | KL?  | D    | D    | D    | D    | D    | D    | D    | D   | Death                  | Disease                    | Visual identification and body found | Unnamed adult female died during respiratory outbreak (date of death 10-Oct-02). Possibly Ch-070, Ch-082, or Ch-083.                             |
| Ch-087          | M                | unk.                   | 1972                | 2002                                        | KL                              | KL   | KL   | KL   | KL   | D    | D    | D    | D    | D    | D    | D    | D   | Death                  | Killed by people?          | Visual identification and genotype   | Probably killed by people (date of death 13-Aug-02). [15]                                                                                        |
| KLSM2           | M                | unk.                   | 1988                | 2002                                        | KL?                             | KL?  | KL?  | KL?  | KL?  | D    | D    | D    | D    | D    | D    | D    | D   | Death                  | Disease                    | Visual identification and body found | Adolescent male (~14 years old) died during respiratory outbreak (date of death 10-Oct-02). Possibly Ch-081.                                     |
| Ch-021          | F                | Ch-089                 | 1987                | 2002                                        | KL                              | KL   | KL   | KL   | KL   | KK   | KK   | KK   | KK   | KK   | KK   | KK   | KK  | Emigration             | Disease                    | Visual identification and genotype   | First seen in Kasekela 22-Jul-02; body found 05-Jan-10.                                                                                          |
| Ch-079          | F                | unk.                   | 1990                | 2002                                        | KL                              | KL   | KL   | KL   | KL   | KK   | KK   | KK   | KK   | KK   | KK   | KK   | KK  | Emigration             | Alive                      | Visual identification and genotype   | First seen in Kasekela 02-Aug-02.                                                                                                                |
| Ch-081          | M                | unk.                   | unk.                | 2002                                        | KL                              | KL   | KL   | KL   | KL   | D    | D    | D    | D    | D    | D    | D    | D   | Death?                 | Unknown                    | Genotype                             | Possibly KLSM2.                                                                                                                                  |
| Ch-085          | M                | unk.                   | unk.                | 2002                                        | KL                              | KL   | KL   | KL   | KL   | D    | D    | D    | D    | D    | D    | D    | D   | Death                  | Disease                    | Genotype                             | Adult male last seen in 2002 weak and with severe diarrhea. Possibly KLAM2.                                                                      |
| BB-089          | unk              | Ch-089                 | 2000                | 2002                                        | N                               | N    | N    | B?   | KL   | KL?  | D    | D    | D    | D    | D    | D    | D   | Death                  | Unknown                    | Visual identification                | BB-089 seen with mother (who was identified by fecal sample) on 23-Aug-02.                                                                       |
| Ch-070          | F                | unk.                   | unk.                | 2002                                        | KL?                             | KL   | KL   | KL   | KL   | KL?  | KL?  | KL?  | D    | D    | D    | D    | D   | Death?                 | Unknown                    | Genotype                             | Possibly KLAF4.                                                                                                                                  |
| Ch-082          | F                | unk.                   | unk.                | 2002                                        | KL?                             | KL   | KL   | KL   | KL   | KL?  | KL?  | KL?  | D    | D    | D    | D    | D   | Death?                 | Unknown                    | Genotype                             | Possibly KLAF4.                                                                                                                                  |
| Ch-083          | F                | unk.                   | unk.                | 2002                                        | KL?                             | KL   | KL   | KL   | KL   | KL?  | KL?  | KL?  | D    | D    | D    | D    | D   | Death?                 | Unknown                    | Genotype                             | Possibly KLAF4.                                                                                                                                  |
| Ch-099          | F                | unk.                   | 1972                | 2003                                        | KL                              | KL   | KL   | KL   | KL   | KL   | KK   | KK   | KK   | D    | D    | D    | D   | Emigration             | Injury                     | Visual identification and genotype   | Transferred to Kasekela 15-Sep-03.                                                                                                               |
| Ch-105          | F                | unk.                   | 1992                | 2003                                        | KL                              | KL   | KL   | KL   | KL   | KL   | KK   | KK   | KK   | KK   | KK   | KK   | KK  | Emigration             | Alive                      | Visual identification and genotype   | Transferred to Kasekela by Dec-03.                                                                                                               |
| Ch-101          | F                | Ch-099                 | 2000                | 2003                                        | N                               | N    | N    | KL   | KL   | KL   | KK   | KK   | KK   | KK   | KK   | KK   | KK  | Emigration             | Alive                      | Visual identification and genotype   | Transferred to Kasekela 15-Sep-03.                                                                                                               |
| Ch-084          | F                | unk.                   | unk.                | 2003                                        | KL?                             | KL?  | KL   | KL   | KL   | KL   | KL?  | KL?  | KL?  | D    | D    | D    | D   | Death?                 | Unknown                    | Genotype                             |                                                                                                                                                  |
| Ch-092          | F                | unk.                   | unk.                | 2003                                        | KL?                             | KL?  | KL   | KL   | KL   | KL   | KL?  | KL?  | KL?  | D    | D    | D    | D   | Death?                 | Unknown                    | Genotype                             |                                                                                                                                                  |
| Ch-091          | F                | Ch-099                 | 1987                | 2004                                        | KL?                             | KL?  | KL?  | KL   | KL   | KL   | KL   | KL?  | KL?  | KL?  | D    | D    | D   | Death?                 | Unknown                    | Genotype                             |                                                                                                                                                  |
| Ch-095          | F                | unk.                   | unk.                | 2004                                        | KL?                             | KL?  | KL?  | KL   | KL   | KL   | KL   | KL?  | KL?  | KL?  | D    | D    | D   | Death?                 | Unknown                    | Genotype                             |                                                                                                                                                  |
| Ch-098          | F                | unk.                   | 1991                | 2004                                        | KL                              | KL   | KL   | KL   | KL   | KL   | MT   | MT   | MT   | MT   | MT   | MT   | MT  | Emigration             | Alive                      | Visual identification and genotype   | First seen in Mitumba 08-Jun-04.                                                                                                                 |
| Ch-071          | F                | Ch-099                 | 1992                | 2005                                        | KL                              | KL   | KL   | KL   | KL   | KL   | KL   | KL   | KL   | KL   | KL   | KL   | KL  | Emigration             | Alive                      | Visual identification and genotype   | Transferred to Kasekela 15-Feb-05.                                                                                                               |
| Ch-107          | F                | unk.                   | unk.                | 2005                                        | KL?                             | KL?  | KL?  | KL?  | KL   | KL   | KL   | KL   | KL?  | KL?  | KL?  | KL?  | D   | Death?                 | Unknown                    | Genotype                             |                                                                                                                                                  |
| KLAF5           | F                | unk.                   | 1979                | NA                                          | KL?                             | KL?  | KL?  | KL?  | KL?  | KL?  | KL?  | KL?  | KL?  | KL?  | KL?  | KL?  | KL? | Possibly still present | Alive?                     | Verbal report                        | Possibly Ch-089, Ch-106, Ch-109, or Ch-121                                                                                                       |
| KLSM3           | M                | KLAF5                  | 1994                | NA                                          | KL?                             | KL?  | KL?  | KL?  | KL?  | KL?  | KL?  | KL?  | KL?  | KL?  | KL?  | KL?  | KL? | Possibly still present | Alive?                     | Verbal report                        | Verbally reported sighting in Aug-05 and Jun-10                                                                                                  |
| KLSF1           | F                | unk.                   | 1988                | NA                                          | KL?                             | KL?  | KL?  | KL?  | KL?  | KL?  | KL?  | KL?  | KL?  | KL?  | KL?  | KL?  | KL? | Possibly still present | Alive?                     | Verbal report                        | Seen in Kalande in 2005; may be female who visited Kasekela Feb-06.                                                                              |
| KLSF2           | F                | KLAF4                  | 1996                | NA                                          | KL?                             | KL?  | KL?  | KL?  | KL?  | KL?  | KL?  | KL?  | KL?  | KL?  | KL?  | KL?  | KL? | Possibly still present | Alive?                     | Visual identification                | Possibly Ch-106, Ch-109, or Ch-121                                                                                                               |
| KLAM4           | M                | unk.                   | 1978                | NA                                          | KL                              | KL   | KL   | KL   | KL   | KL   | KL   | KL   | KL   | KL   | KL   | KL   | KL  | Likely still present   | Alive                      | Visual identification                | Adult male, regularly seen but apparently not yet sampled.                                                                                       |
| Ch-108          | F                | Ch-089                 | 1993                | 2006                                        | KL                              | KL   | KL   | KL   | KL   | KL   | KL   | KL   | KL   | KL   | KL   | KL   | KL  | Likely still present   | Alive                      | Visual identification and genotype   |                                                                                                                                                  |
| Ch-064          | F                | unk.                   | 1975                | NA                                          | KL                              | KL   | KL   | KL   | KL   | KL   | KL   | KL   | KL   | KL   | KL   | KL   | KL  | Likely still present   | Alive                      | Visual identification and genotype   |                                                                                                                                                  |
| Ch-086          | F                | unk.                   | 1985                | NA                                          | KL                              | KL   | KL   | KL   | KL   | KL   | KL   | KL   | KL   | KL   | KL   | KL   | KL  | Likely still present   | Alive                      | Visual identification and genotype   | Regularly seen adult female.                                                                                                                     |
| Ch-089          | F                | unk.                   | 1972                | NA                                          | KL                              | KL   | KL   | KL   | KL   | KL   | KL   | KL   | KL   | KL   | KL   | KL   | KL  | Likely still present   | Alive                      | Visual identification and genotype   |                                                                                                                                                  |

| ID <sup>1</sup>           | Sex <sup>2</sup> | Mother ID <sup>3</sup> | Possible birth year | Year of departure from Kalande <sup>4</sup> | Kalande membership <sup>5</sup> |      |      |      |      |      |      |      |      |      |      | Cause of departure | Cause of death       | Evidence for existence | Comments                           |                                                                                                                |
|---------------------------|------------------|------------------------|---------------------|---------------------------------------------|---------------------------------|------|------|------|------|------|------|------|------|------|------|--------------------|----------------------|------------------------|------------------------------------|----------------------------------------------------------------------------------------------------------------|
|                           |                  |                        |                     |                                             | 1998                            | 1999 | 2000 | 2001 | 2002 | 2003 | 2004 | 2005 | 2006 | 2007 | 2008 |                    |                      |                        |                                    | 2009                                                                                                           |
| Ch-093                    | F                | Ch-024                 | 1984                | NA                                          | MT                              | KL   | KL   | KL   | KL   | KL   | KL   | KL   | KL   | KL   | KL   | KL                 | Likely still present | Alive                  | Visual identification and genotype | Likely transferred from Mitumba in Oct-98. Visited Kasekela Mar-06, Mar-08, but was back in Kalande by Aug-08. |
| Ch-088                    | F                | Ch-086                 | 2000                | NA                                          | N                               | N    | N    | N    | B    | KL   | KL   | KL   | KL   | KL   | KL   | KL                 | Likely still present | Alive                  | Visual identification and genotype | Seen as newborn 15-Sep-02.                                                                                     |
| Ch-100                    | M                | Ch-064                 | 2001                | NA                                          | N                               | N    | N    | B    | KL   | KL   | KL   | KL   | KL   | KL   | KL   | KL                 | Likely still present | Alive                  | Visual identification and genotype |                                                                                                                |
| Ch-109                    | F                | unk.                   | 1999                | NA                                          | KL?                             | KL?  | KL?  | KL?  | KL   | KL   | KL   | KL   | KL   | KL   | KL   | KL                 | Likely still present | Alive                  | Genotype                           | Described as an adult female with sexual swelling when seen in 2005.                                           |
| Ch-110                    | M                | Ch-093                 | 2002                | NA                                          | N                               | N    | N    | N    | B    | KL   | KL   | KL   | KL   | KL   | KL   | KL                 | Likely still present | Alive                  | Visual identification and genotype | Visited Kasekela Mar-06, Mar-08, but back in Kalande by Aug-08.                                                |
| Ch-106                    | F                | unk.                   | unk.                | NA                                          | KL?                             | KL?  | KL?  | KL?  | KL?  | KL   | KL   | KL   | KL   | KL   | KL   | KL                 | Likely still present | Alive                  | Genotype                           |                                                                                                                |
| Ch-118                    | M                | Ch-089                 | 2005                | NA                                          | N                               | N    | N    | N    | N    | N    | N    | B    | KL   | KL   | KL   | KL                 | Likely still present | Alive                  | Genotype                           | Possibly KL3M3.                                                                                                |
| Ch-121                    | F                | unk.                   |                     | NA                                          | KL?                             | KL?  | KL?  | KL?  | KL?  | KL?  | KL?  | KL?  | KL   | KL   | KL   | KL                 | Likely still present | Alive                  | Genotype                           |                                                                                                                |
| BB-064                    | unk              | Ch-064                 | 2007                | NA                                          | N                               | N    | N    | N    | N    | N    | N    | N    | N    | B    | KL   | KL                 | Likely still present | Alive                  | Visual identification              | BB-064 first seen 28-Jan-07 with its mother and was estimated to be 2-4 weeks old.                             |
| BB-093                    | unk              | Ch-093                 | 2009                | NA                                          | N                               | N    | N    | N    | N    | N    | N    | N    | N    | N    | N    | B                  | Likely still present | Alive                  | Visual identification              | BB-093 was first seen 23-Jun-09.                                                                               |
| <b>Minimum population</b> |                  |                        |                     |                                             | 19                              | 20   | 22   | 24   | 28   | 20   | 15   | 13   | 13   | 13   | 14   | 14                 |                      |                        |                                    |                                                                                                                |
| <b>Maximum population</b> |                  |                        |                     |                                             | 43                              | 40   | 36   | 35   | 36   | 29   | 25   | 25   | 22   | 20   | 19   | 18                 |                      |                        |                                    |                                                                                                                |

<sup>1</sup>ID, chimpanzee identification; individuals identified from genotyped fecal samples are named following the convention Ch-###, while chimpanzees not linked to genotyped samples are named with a code that indicates community of residence (KL, Kalande), age class (A, adult, S, subadult, I, immature), sex (M, male, F, female), and a number indicating the order in which they were named.

<sup>2</sup>M, male; F, female; unk., unknown.

<sup>3</sup>Mother ID, identity of the mother; unk., unknown (see Methods and Table S5 for more information).

<sup>4</sup>The year of departure is based on the last sighting or sampling of the individual in Kalande or their date of arrival in another community; NA, not applicable.

<sup>5</sup>The columns indicate the status of each individual at the start of the year, including community membership (KL, Kalande, KK, Kasekela, MT, Mitumba) and life history status (N, not yet born, B, born during that year, D, dead). Question marks indicate that the individual's status is uncertain for that year. Each cell is color-coded to indicate the quality of evidence for the existence and residence location of each individual during that year (no color, status uncertain; tan, verbal report; light yellow, visual observation; light green, inferred to be present; dark green, genotyped fecal sample collected; blue, known or presumed to have died or emigrated).
