# Supplementary material for: Impact of Simian Immunodeficiency Virus Infection on Chimpanzee Population Dynamics
Source: PubMed Central journal article supplement (PMC2944804; doi:10.1371/journal.ppat.1001116), 2010-09-23
Supplement: ppat.1001116.s006.pdf [file ppat.1001116.s006.pdf]

**Table S5.** Genetic evidence of dyadic relatedness.

| Target <sup>1</sup>  | Possible Kin         | MT Haplotype <sup>2</sup> | Number of Mismatches <sup>3</sup> | CERVUS Parentage Confidence Level <sup>4</sup> | KINSHIP Relatedness (R) <sup>5</sup> | KINSHIP Parent-Offspring <sup>6</sup> | KINSHIP Full Sibling <sup>7</sup> | KINSHIP Maternal Half Sibling <sup>8</sup> | KINSHIP Paternal Half Sibling <sup>9</sup> | Likely Relationship to Target |
|----------------------|----------------------|---------------------------|-----------------------------------|------------------------------------------------|--------------------------------------|---------------------------------------|-----------------------------------|--------------------------------------------|--------------------------------------------|-------------------------------|
| Ch-047               | Ch-082               | 1                         | 0                                 | 80%                                            | 0.37                                 | *                                     | NS                                | NS                                         | NS                                         | Mother or other close kin     |
| Ch-082               | Ch-083               | 1                         | 1                                 | NA                                             | 0.40                                 | NA                                    | *                                 | *                                          | *                                          | Sibling                       |
| Ch-083               | Ch-047               | 1                         | 3                                 | NA                                             | 0.04                                 | NA                                    | NS                                | NS                                         | NS                                         | None                          |
| Ch-081               | Ch-077 <sup>10</sup> | 1                         | 0                                 | NA                                             | 0.38                                 | NA                                    | *                                 | *                                          | NS                                         | None                          |
| Ch-088               | Ch-086               | 2                         | 0                                 | 80%                                            | 0.48                                 | ***                                   | ***                               | ***                                        | ***                                        | Mother                        |
| Ch-088               | Ch-107               | 2                         | 1                                 | NA                                             | 0.42                                 | NA                                    | ***                               | ***                                        | ***                                        | Other kin                     |
| Ch-086               | Ch-107               | 2                         | 1                                 | NA                                             | 0.68                                 | NA                                    | ***                               | ***                                        | ***                                        | Sibling                       |
| Ch-088               | Ch-029               | 2                         | 0                                 | NS                                             | 0.46                                 | *                                     | *                                 | *                                          | *                                          | Other kin                     |
| Ch-029               | Ch-107               | 2                         | 1                                 | NA                                             | 0.12                                 | NA                                    | NS                                | NS                                         | NS                                         | None                          |
| Ch-029               | Ch-086               | 2                         | 1                                 | NA                                             | 0.13                                 | NA                                    | NS                                | NS                                         | NS                                         | None                          |
| Ch-087               | Ch-029               | 2                         | 0                                 | 95%                                            | 0.39                                 | *                                     | *                                 | *                                          | *                                          | Other kin                     |
| Ch-087               | Ch-088               | 2                         | 1                                 | NA                                             | 0.32                                 | NA                                    | *                                 | *                                          | *                                          | Other kin                     |
| Ch-087               | Ch-107               | 2                         | 2                                 | NA                                             | 0.19                                 | NA                                    | *                                 | *                                          | *                                          | Other kin                     |
| Ch-087               | Ch-086               | 2                         | 3                                 | NA                                             | 0.06                                 | NA                                    | NS                                | NS                                         | NS                                         | None                          |
| Ch-087               | Ch-085               | 2                         | 0                                 | 95% <sup>11</sup>                              | 0.38                                 | *                                     | *                                 | *                                          | *                                          | Sibling or other kin          |
| Ch-029               | Ch-085               | 2                         | 1                                 | NA                                             | 0.45                                 | NA                                    | *                                 | *                                          | *                                          | Sibling or other kin          |
| Ch-088               | Ch-085               | 2                         | 4                                 | NA                                             | -0.11                                | NA                                    | NS                                | NS                                         | NS                                         | None                          |
| Ch-107               | Ch-085               | 2                         | 3                                 | NA                                             | -0.03                                | NA                                    | NS                                | NS                                         | NS                                         | None                          |
| Ch-086               | Ch-085               | 2                         | 4                                 | NA                                             | -0.22                                | NA                                    | NS                                | NS                                         | NS                                         | None                          |
| Ch-070               | Ch-042               | 2                         | 1                                 | NA                                             | 0.19                                 | NA                                    | NS                                | NS                                         | NS                                         | None                          |
| Ch-070               | Ch-029               | 2                         | 1                                 | NA                                             | 0.18                                 | NA                                    | NS                                | NS                                         | NS                                         | None                          |
| Ch-108               | Ch-089               | 3                         | 0                                 | 95%                                            | 0.45                                 | ***                                   | ***                               | ***                                        | ***                                        | Mother                        |
| Ch-021               | Ch-089               | 3                         | 0                                 | 95%                                            | 0.41                                 | ***                                   | ***                               | ***                                        | ***                                        | Mother                        |
| Ch-103 <sup>12</sup> | Ch-089               | 3                         | 6                                 | NA                                             | 0.24                                 | NA                                    | NS                                | NS                                         | NS                                         | Grandmother                   |
| Ch-118               | Ch-089               | 3                         | 0                                 | 95%                                            | 0.43                                 | ***                                   | *                                 | *                                          | ***                                        | Mother                        |
| Ch-118               | Ch-108               | 3                         | 1                                 | NA                                             | 0.46                                 | NA                                    | ***                               | ***                                        | ***                                        | Sibling                       |
| Ch-021               | Ch-108               | 3                         | 3                                 | NA                                             | 0.20                                 | NA                                    | NS                                | *                                          | *                                          | Sibling                       |
| Ch-118               | Ch-021               | 3                         | 4                                 | NA                                             | -0.17                                | NA                                    | NS                                | NS                                         | NS                                         | Sibling                       |
| Ch-095               | Ch-050 <sup>13</sup> | 3                         | 0                                 | 95%                                            | 0.92                                 | ***                                   | ***                               | ***                                        | ***                                        | Sibling or other kin          |
| Ch-052 <sup>13</sup> | Ch-095               | 3                         | 0                                 | NA                                             | 0.50                                 | NA                                    | *                                 | ***                                        | NS                                         | Other kin                     |
| Ch-061 <sup>13</sup> | Ch-095               | 3                         | 0                                 | NA                                             | 0.38                                 | NA                                    | *                                 | ***                                        | NS                                         | Other kin                     |
| Ch-080               | Ch-106               | 9                         | 1                                 | NA                                             | 0.27                                 | NA                                    | NS                                | NS                                         | NS                                         | None                          |
| Ch-101               | Ch-099               | 10                        | 0                                 | 80%                                            | 0.59                                 | ***                                   | ***                               | ***                                        | ***                                        | Mother                        |
| Ch-071               | Ch-099               | 10                        | 0                                 | 80%                                            | 0.54                                 | ***                                   | ***                               | ***                                        | ***                                        | Mother                        |
| Ch-091               | Ch-099               | 10                        | 0                                 | Ch-071 <sup>14</sup> 80%                       | 0.62                                 | ***                                   | ***                               | ***                                        | ***                                        | Mother                        |

| Target <sup>1</sup> | Possible Kin               | MT Haplotype <sup>2</sup> | Number of Mismatches <sup>3</sup> | CERVUS Parentage Confidence Level <sup>4</sup> | KINSHIP Relatedness (R) <sup>5</sup> | KINSHIP Parent-Offspring <sup>6</sup> | KINSHIP Full Sibling <sup>7</sup> | KINSHIP Maternal Half Sibling <sup>8</sup> | KINSHIP Paternal Half Sibling <sup>9</sup> | Likely Relationship to Target |
|---------------------|----------------------------|---------------------------|-----------------------------------|------------------------------------------------|--------------------------------------|---------------------------------------|-----------------------------------|--------------------------------------------|--------------------------------------------|-------------------------------|
| <b>Ch-091</b>       | <b>Ch-071</b>              | 10                        | 0                                 | 80%                                            | 0.75                                 | ***                                   | ***                               | ***                                        | ***                                        | Sibling                       |
| <b>Ch-101</b>       | <b>Ch-091</b>              | 10                        | 0                                 | Ch-099 <sup>14</sup> 80%                       | 0.83                                 | ***                                   | ***                               | ***                                        | ***                                        | Sibling                       |
| <b>Ch-101</b>       | <b>Ch-071</b>              | 10                        | 2                                 | NA                                             | 0.71                                 | NA                                    | ***                               | ***                                        | ***                                        | Sibling                       |
| <b>Ch-093</b>       | <b>Ch-024<sup>15</sup></b> | 11                        | 0                                 | 95%                                            | 0.21                                 | ***                                   | *                                 | ***                                        | ***                                        | Mother                        |
| <b>Ch-093</b>       | <i>Ch-034<sup>15</sup></i> | 11                        | 2                                 | NA                                             | 0.02                                 | NA                                    | *                                 | ***                                        | NS                                         | Sibling                       |
| <b>Ch-093</b>       | <i>Ch-058<sup>15</sup></i> | 11                        | 2                                 | NA                                             | 0.06                                 | NA                                    | NS                                | *                                          | NS                                         | Sibling                       |
| <i>Ch-110</i>       | <b>Ch-093</b>              | 11                        | 0                                 | 95%                                            | 0.31                                 | ***                                   | *                                 | ***                                        | ***                                        | Mother                        |
| <b>Ch-092</b>       | <b>Ch-093</b>              | 11                        | 3                                 | NA                                             | 0.36                                 | NA                                    | ***                               | *                                          | *                                          | Other kin                     |
| <i>Ch-110</i>       | <b>Ch-024</b>              | 11                        | 1                                 | NA                                             | 0.28                                 | NA                                    | *                                 | *                                          | ***                                        | Grandmother                   |
| <b>Ch-092</b>       | <b>Ch-024</b>              | 11                        | 2                                 | NA                                             | -0.01                                | NA                                    | NS                                | *                                          | *                                          | Other kin                     |
| <i>Ch-110</i>       | <b>Ch-092</b>              | 11                        | 3                                 | NA                                             | -0.06                                | NA                                    | NS                                | NS                                         | NS                                         | None                          |
| <b>Ch-033</b>       | <b>Ch-093</b>              | 11                        | 1                                 | NA                                             | 0.23                                 | NA                                    | *                                 | *                                          | *                                          | Other kin                     |
| <b>Ch-033</b>       | <b>Ch-092</b>              | 11                        | 2                                 | NA                                             | 0.08                                 | NA                                    | NS                                | NS                                         | NS                                         | None                          |
| <b>Ch-033</b>       | <b>Ch-024</b>              | 11                        | 4                                 | NA                                             | -0.09                                | NA                                    | NS                                | NS                                         | NS                                         | None                          |
| <b>Ch-033</b>       | <i>Ch-110</i>              | 11                        | 3                                 | NA                                             | -0.02                                | NA                                    | NS                                | NS                                         | NS                                         | None                          |
| <b>Ch-079</b>       | <b>Ch-064</b>              | 13                        | 0                                 | 80%                                            | 0.36                                 | *                                     | *                                 | *                                          | *                                          | Mother                        |
| <i>Ch-100</i>       | <b>Ch-064</b>              | 13                        | 0                                 | 80%                                            | 0.43                                 | *                                     | *                                 | NS                                         | NS                                         | Mother or other close kin     |
| <i>Ch-100</i>       | <b>Ch-079</b>              | 13                        | 2                                 | NA                                             | 0.36                                 | NA                                    | NS                                | NS                                         | NS                                         | Sibling or other kin          |
| <b>Ch-109</b>       | <b>Ch-084</b>              | 13                        | 0                                 | 95%                                            | 0.67                                 | *                                     | *                                 | *                                          | *                                          | Sibling or other kin          |
| <b>Ch-084</b>       | <i>Ch-048<sup>16</sup></i> | 13                        | 0                                 | NS                                             | 0.09                                 | NS                                    | NS                                | NS                                         | NS                                         | None                          |
| <b>Ch-109</b>       | <i>Ch-048</i>              | 13                        | 2                                 | NA                                             | -0.13                                | NA                                    | NS                                | NS                                         | NS                                         | None                          |

<sup>1</sup>The most recent community of residence of the Target and Possible Kin chimpanzee is coded by color (Kalande, orange; Kasekela, brown; Mitumba, blue). Females are in bold while males are in non-bold italics.

<sup>2</sup>MT Haplotype, numbers indicate the mitochondrial DNA haplotype of both the Target and Possible Kin as previously reported [2].

<sup>3</sup>Number of Mismatches, number of microsatellite allelic mismatches between the Target/Possible Kin dyad.

<sup>4</sup>CERVUS Parentage Confidence Level, the relaxed confidence level from CERVUS (80%) and the strict confidence level (95%); most likely, the individual is the strongest candidate parent but did not fit the confidence level criteria; NS, CERVUS did not find a relationship between the dyad; NA, the pair was not tested as parent-offspring in CERVUS due to allelic mismatches or previously known parent-offspring relationships.

<sup>5</sup>KINSHIP Relatedness (R), the dyadic relatedness value for the Target and Possible Kin from KINSHIP. Values should be approximately 0.50 for parent-offspring and full siblings and 0.25 for half-siblings; however, values can vary considerably when examining small numbers of genetic regions.

<sup>6</sup>KINSHIP Parent-Offspring, significance from KINSHIP for the relationship; asterisks indicate p-value: \*\*\* P < 0.001; \* P ≤ 0.05; NA, the pair was not tested as parent-offspring in KINSHIP due to allelic mismatches or previously known parent-offspring relationships; NS, not significant.

<sup>7</sup>KINSHIP Full Sibling, significance level from KINSHIP for the relationship.

<sup>8</sup>KINSHIP Maternal Half Sibling, significance level from KINSHIP for the relationship.

<sup>9</sup>KINSHIP Paternal Half Sibling, significance level from KINSHIP for the relationship.

<sup>10</sup>Maternity and paternity are both known for Ch-077 and neither parent is Ch-081. Ch-077 was below reproductive age and was not considered as a potential parent to Ch-081.

<sup>11</sup>It is possible, but unlikely, for a father to be from within the same haplotype: of 39 known paternities to date, only two were between parents sharing the same haplotype (Wroblewski, unpublished data), and one of which was an unusual case of inbreeding [33].

<sup>12</sup>Ch-021 is the known mother to Ch-103.

<sup>13</sup>Ch-050 is the known mother to Ch-052 and Ch-061; neither Ch-052 nor Ch-061 were of age to be considered as potential parents to Ch-095.

<sup>14</sup>Parent for Target identified by CERVUS was not the Possible Kin.

<sup>15</sup>Ch-024 is the known mother to Ch-034 and Ch-058.

<sup>16</sup>Maternity was known for Ch-048 and it was not Ch-084.
