# Supplementary material for: Impact of Simian Immunodeficiency Virus Infection on Chimpanzee Population Dynamics
Source: PubMed Central journal article supplement (PMC2944804; doi:10.1371/journal.ppat.1001116), 2010-09-23
Supplement: ppat.1001116.s007.pdf [file ppat.1001116.s007.pdf]

**Table S6.** Genetic evidence for paternal relationships.

| Offspring <sup>1</sup> | Mother        | Father                         | CERVUS Parentage Confidence Level <sup>2</sup> | KINSHIP Relatedness (R) (Father-Offspring) <sup>3</sup> | KINSHIP Parent-Offspring <sup>4</sup> |
|------------------------|---------------|--------------------------------|------------------------------------------------|---------------------------------------------------------|---------------------------------------|
| <b>Ch-088</b>          | <b>Ch-086</b> | <i>Ch-081</i>                  | 95%                                            | 0.36                                                    | *                                     |
| <i>Ch-118</i>          | <b>Ch-089</b> | <i>Ch-020</i>                  | 95%                                            | 0.40                                                    | *                                     |
| <b>Ch-101</b>          | <b>Ch-099</b> | <i>Ch-085</i>                  | 95%                                            | 0.61                                                    | *                                     |
| <b>Ch-071</b>          | <b>Ch-099</b> | <i>[Ch-085]</i> <sup>5,6</sup> | [95%]                                          | 0.52                                                    | *                                     |
| <b>Ch-091</b>          | <b>Ch-099</b> | <i>Ch-085</i>                  | 95%                                            | 0.74                                                    | ***                                   |
| <b>Ch-093</b>          | <b>Ch-024</b> | <i>Evered</i>                  | 80%                                            | 0.24                                                    | *                                     |
| <i>Ch-110</i>          | <b>Ch-093</b> | <i>Ch-081</i>                  | NS <sup>7</sup>                                | 0.06                                                    | *                                     |
| <i>Ch-100</i>          | <b>Ch-064</b> | <i>[Ch-085]</i> <sup>5,8</sup> | [most likely]                                  | 0.39                                                    | *                                     |

<sup>1</sup>The most recent community of residence of the Offspring, Mother, and Father chimpanzee is coded by color (Kalande, orange; Kasekela, brown; Mitumba, blue). Females are in bold while males are in non-bold italics.

<sup>2</sup>CERVUS Parentage Confidence Level, the relaxed confidence level from CERVUS (80%) and the strict confidence level (95%); most likely, the individual is the strongest candidate parent but did not fit the confidence level criteria; NS, not significant.

<sup>3</sup>KINSHIP Relatedness (R) (Father-Offspring), dyadic relatedness value for the Father and Offspring from KINSHIP. Values should be roughly 0.5 for parent-offspring; however, values can vary considerably when examining small numbers of genetic regions.

<sup>4</sup>KINSHIP Parent-Offspring, significance from KINSHIP for the relationship between father and offspring; asterisks indicate p-value: \*\*\* P < 0.001; \* P < 0.05.

<sup>5</sup>There were no microsatellite allelic mismatches for the offspring/mother/father triad unless enclosed in brackets. In those cases, the confidence value, also in brackets, only applies when the mother is not included as the mother in CERVUS paternity analyses.

<sup>6</sup>When Ch-099 is included as the mother of Ch-071, no male lacks mismatches with the genotypes of Ch-099 and Ch-071.

<sup>7</sup>When Ch-093 was included as the mother of Ch-110, Ch-085 scored as the "most likely" father, but had one mismatch with the proposed mother-offspring pair. Ch-081 was the only male that lacked mismatches with the mother-offspring pair.

<sup>8</sup>When Ch-064 is included as the mother of Ch-100, no male lacks mismatches with the genotypes of Ch-064 and Ch-100.
