# Supplementary material for: Impact of Simian Immunodeficiency Virus Infection on Chimpanzee Population Dynamics
Source: PLoS Pathog. 2010 Sep 23;6(9):e1001116. doi: 10.1371/journal.ppat.1001116 (PMC2944804; doi:10.1371/journal.ppat.1001116)
Supplement: Table S4 — Evidence for existence, departure, and causes of death for Kalande chimpanzees. (0.05 MB PDF) [file ppat.1001116.s005.pdf]

**Table S4.** Evidence for existence, departure, and causes of death for Kalande chimpanzees.

| Evidence for existence               | Number of individuals | SIVcpz negative | SIVcpz positive | SIVcpz status unknown | Individuals <sup>1</sup>                                                                                                                                                                                 |
|--------------------------------------|-----------------------|-----------------|-----------------|-----------------------|----------------------------------------------------------------------------------------------------------------------------------------------------------------------------------------------------------|
| Visual identification AND genotype   | 20                    | 12              | 8               | 0                     | Ch-021 <sup>2</sup> , Ch-022, Ch-029, Ch-033 <sup>2</sup> , Ch-064, Ch-071, Ch-076, Ch-079, Ch-086, Ch-087, Ch-088, Ch-089, Ch-093, Ch-098, Ch-099 <sup>2</sup> , Ch-100, Ch-101, Ch-105, Ch-108, Ch-110 |
| Visual identification                | 8                     | unknown         | unknown         | 8                     | BB-064, BB-089, KLAM2, KLAM4, KLI1, KLSM1, KLSF2, BB-093                                                                                                                                                 |
| Genotype                             | 14                    | 7               | 7               | 0                     | Ch-070, Ch-081, Ch-082, Ch-083, Ch-084, Ch-085, Ch-091, Ch-092, Ch-095, Ch-106, Ch-107, Ch-109, Ch-118, Ch-121                                                                                           |
| Verbal report                        | 6                     | unknown         | unknown         | 6                     | KLAF1, KLAF2, KLAFF5, KLI2, KLSF1, KLMS3,                                                                                                                                                                |
| Visual identification AND body found | 2                     | unknown         | unknown         | 2                     | KLAF4, KLMS2                                                                                                                                                                                             |
| Body found                           | 2                     | unknown         | unknown         | 2                     | KLAF3, KLAM1                                                                                                                                                                                             |
| <b>Total</b>                         | <b>52</b>             | <b>19</b>       | <b>15</b>       | <b>18</b>             |                                                                                                                                                                                                          |
| <b>Cause of departure</b>            |                       |                 |                 |                       |                                                                                                                                                                                                          |
| Emigration                           | 11                    | 7 <sup>2</sup>  | 4               | 0                     | Ch-021 <sup>2</sup> , Ch-022, Ch-029, Ch-033 <sup>2</sup> , Ch-071, Ch-076, Ch-079, Ch-098, Ch-099 <sup>2</sup> , Ch-101, Ch-105                                                                         |
| Death                                | 10                    | 2               | 0               | 8                     | BB-089, Ch-085, Ch-087, KLAF3, KLAF4, KLAM1, KLAM2, KLI1, KLMS1, KLMS2                                                                                                                                   |
| Death?                               | 12                    | 5               | 4               | 3                     | Ch-070, Ch-081, Ch-082, Ch-083, Ch-084, Ch-091, Ch-092, Ch-095, Ch-107, KLAF1, KLAF2, KLI2                                                                                                               |
| Possibly still present               | 4                     | unknown         | unknown         | 4                     | KLAF5, KLSF1, KLSF2, KLMS3                                                                                                                                                                               |
| Likely still present                 | 15                    | 5               | 7               | 3                     | BB-064, BB-093, Ch-064, Ch-086, Ch-088, Ch-089, Ch-093, Ch-100, Ch-106, Ch-108, Ch-109, Ch-110, Ch-118, Ch-121, KLAM4                                                                                    |
| <b>Total</b>                         | <b>52</b>             | <b>19</b>       | <b>15</b>       | <b>18</b>             |                                                                                                                                                                                                          |
| <b>Cause of death</b>                |                       |                 |                 |                       |                                                                                                                                                                                                          |
| Unknown                              | 11                    | 5               | 5               | 1                     | Ch-033 <sup>2</sup> , Ch-70, Ch-081, Ch-082, Ch-083, Ch-084, Ch-091, Ch-092, Ch-095, Ch-107, BB-089                                                                                                      |
| Disease                              | 5                     | 1               | 1               | 3                     | Ch-021 <sup>2</sup> , Ch-085, KLAF4, KLMS2, KLAM2                                                                                                                                                        |
| Killed by people? Disease?           | 4                     | 0               | 0               | 4                     | KLAF1, KLAF2, KLAFF3, KLAM1                                                                                                                                                                              |
| Killed by people?                    | 2                     | 1               | 0               | 1                     | Ch-087, KLI2                                                                                                                                                                                             |
| Intergroup aggression                | 2                     | 0               | 0               | 2                     | KLI1, KLMS1                                                                                                                                                                                              |
| Injury                               | 1                     | 0               | 1               | 0                     | Ch-099 <sup>2</sup>                                                                                                                                                                                      |
| <b>Total</b>                         | <b>25</b>             | <b>7</b>        | <b>7</b>        | <b>11</b>             |                                                                                                                                                                                                          |

<sup>1</sup>Red, infected with SIVcpz; black, not infected with SIVcpz; blue, not tested for SIVcpz infection.<sup>2</sup>Ch-021, Ch-033 and Ch-099 died after emigrating from Kalande.
